# Supplementary material for: A Facile Method to Synthesize b-Oriented Silicalite-1 Thin Film
Source: MDPI journal article supplement (doi:10.3390/membranes12050520), 2022-05-13
Supplement: s1 [file s1]

**Supporting Information (SI)**

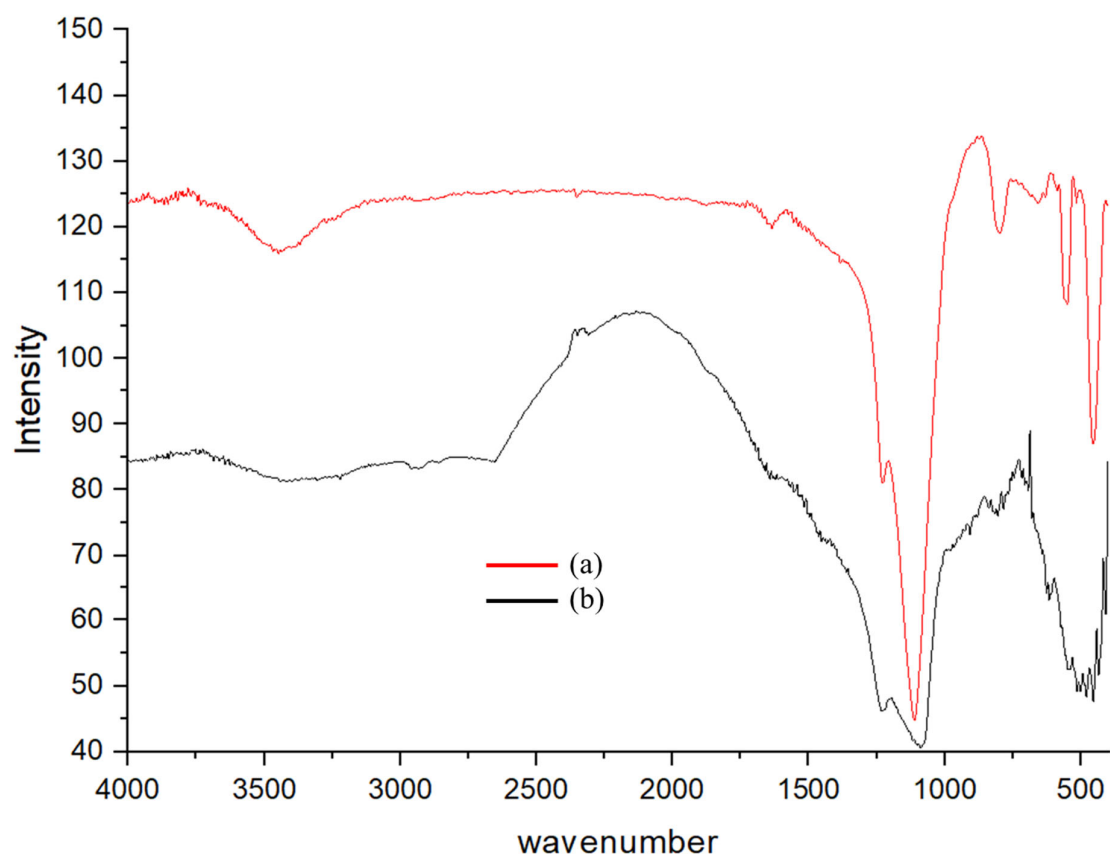

**Figure S1.** FTIR of silicalite-1 on silicon substrate (a), silicalite-1 membrane (c), silicalite-1 powder.
